# Supplementary material
Source: ML conference proceedings conference paper supplement (https://aclanthology.org/2020.conll-1.13)
Supplement: OptionalSupplementaryMaterial [file supplementary.pdf › supplementary.pdf]

# Recurrent babbling: Supplementary Material

Ludovica Pannitto

CIMeC

University of Trento

`ludovica.pannitto@unitn.it`

Aur lie Herbelot

CIMeC/DISI

University of Trento

`aurelie.herbelot@unitn.it`

## 1 Corpus

- For the parser, we used the `english-ewt` model from *Universal Dependencies 2.3 Models*<sup>1</sup>
- Table 1 summarizes some of the features of the three subcorpora we used
- In order to extract portions of 3 million tokens with (almost) uniform probability, we used a slight variation of `reservoir sampling`, the pseudocode listing is provided in Listing 1

## 2 Language Models

- The bayesian optimization was performed in two steps, the first to isolate the interesting intervals for hyperparameters that would suit all the three subcorpora, and the second one to find the best configuration. Table 2 summarized the ranges used for both steps and Table 3 contains the configurations of the best models for all subcorpora.
- From each model, our aim was to sample approximately the same amount of language provided as input. Since the network was character-based, but the remainder of the extraction process happened on a sentence-by-sentence basis, we had to balance the two aspects. Therefore, we fixed a number of iterations (150), and sampled a starting letter at the beginning of each one, based on the distribution of letters at the beginning of sentences in the original corpus. For each iteration, we sampled a variable number of sentences in order to match the number of sentences in the input (359 for opensubtitles, 159 for simplewikipedia and 597 for childes). We also

set a maximum number of characters per sentence (average sentence length of input + 2 standard deviations) as we wanted to avoid loops, especially in models snapshotted at earlier epochs.

- The complete set of generated language can be downloaded at [https://osf.io/r25at/?view\\_only=77afc9a31e424f819f4e3e6ea73a2f7f](https://osf.io/r25at/?view_only=77afc9a31e424f819f4e3e6ea73a2f7f), along with the input data.

## 3 Catenae

- The recursive algorithm used to extract catenae is reported in Listing 2
- A selection of the most and least associated catenae for each subcorpora can be found in Tables 4, 5 and ??

## 4 What do ANNs approximate?

Tables 11, 12, 13, report correlation values (Spearman  $\rho$ ) computed over top  $10K$  catenae extracted from each *babbling* stage, for CHILDES, opensubtitles and simplewikipedia respectively.

Table 14 shows the same values computed among structures extracted from *best models* (BM) and the input corpora.

## 5 Meaning and abstraction

- Kruskal-Wallis test is significant regardless of the dependent variable (*similarity* or *distributional shift*). When grouping on the distributional shift we considered as negative shift catenae that had average difference below  $-0.05$ , as no difference catenae that had average difference between  $-0.05$  and  $0.05$  and as positive difference catenae that had average difference above  $0.05$ . Results are as follows, as reported in the paper:

<sup>1</sup><https://lindat.mff.cuni.cz/repository/xmlui/handle/11234/1-2898>, Straka and Strakov  (2018)

$$p = 6.988142426844016e - 28 \text{ for } cat_1;$$

$$p = 7.420868598608134e - 32 \text{ for } cat_2.$$

When grouping on similarity, we considered catenae with average cosine similarity above 0.7 in the *high similarity* group, catenae with average cosine similarity between 0.4 and 0.7 in the *medium similarity* group, and catenae with average cosine similarity below 0.4 in the *low similarity* group. Results are as follows:

$$p = 1.070823941185318e - 66 \text{ for } cat_1;$$

$$p = 1.6648509572822658e - 72 \text{ for } cat_2$$

- Posthocs are reported in Tables [7](#), [8](#), [9](#) and [10](#). Figures [1a](#), [1b](#), [1c](#) and [1d](#) show the distributions, respectively.

|                                             | CHILDES | opensubtitles | simplewikipedia |
|---------------------------------------------|---------|---------------|-----------------|
| <b>number of sentences</b>                  | 527k    | 430k          | 184k            |
| <b>number of tokens</b>                     | 2,799k  | 2,421k        | 2,570k          |
| <b>vocabulary size</b>                      | 21k     | 45k           | 114k            |
| <b>average sentence length</b>              | 5.311   | 5.634         | 13.965          |
| <b>average word length</b>                  | 3.403   | 3.722         | 4.494           |
| <b>type-token ratio</b>                     | 0.007   | 0.018         | 0.044           |
| <b>hapax-token ratio</b>                    | 0.003   | 0.008         | 0.025           |
| <b>lexical density</b>                      | 0.543   | 0.552         | 0.600           |
| <b>average depth of sentences</b>           | 2.779   | 2.891         | 4.386           |
| <b>average <i>arity</i> of verbal roots</b> | 2.831   | 4.176         | 4.948           |
| <b>Verb</b>                                 | 60.25%  | 51.18%        | 59.87%          |
| <b>Noun</b>                                 | 20.90%  | 22.35%        | 33.25%          |
| <b>Adjective</b>                            | 6.13%   | 9.75%         | 4.58%           |
| <b>Pronoun</b>                              | 2.36%   | 1.16%         | 0.05%           |
| <b>Wh-word</b>                              | 3.60%   | 2.26%         | 0.08%           |

Table 1: The table shows some simple figures that highlight some of the differences among the resources we gathered.

|                      | step 1  | step 2  |
|----------------------|---------|---------|
| <b>batch size</b>    | 20-129  | 20-40   |
| <b>emsize</b>        | 40-401  | 350-500 |
| <b>hidden</b>        | 40-401  | 350-500 |
| <b>nlayers</b>       | 2,4     | 3,4     |
| <b>dropout</b>       | 0-0.5   | 0-0.2   |
| <b>learning rate</b> | 0.001-1 | 0.8-1   |
| <b>epochs</b>        | 50-150  | 30-70   |
| <b>seq length</b>    | 10-101  | 15-50   |

Table 2: Hyperparameters' regions used for step 1 and step 2 of the bayesian optimization procedure.

| corpus          | target | batch | emsize | hidden | nlayers | dropout | lr   | epochs | bptt |
|-----------------|--------|-------|--------|--------|---------|---------|------|--------|------|
| CHILDES         | 1.063  | 28    | 371    | 495    | 3       | 0.112   | 0.96 | 37     | 39   |
| opensubtitles   | 1.148  | 20    | 353    | 495    | 3       | 0.163   | 0.92 | 46     | 48   |
| simplewikipedia | 1.171  | 28    | 371    | 495    | 3       | 0.112   | 0.96 | 37     | 39   |

Table 3: Target values (perplexity) and parameters of the best models selected by the bayesian optimizer.

Listing 1: Reservoir sampling

```

1 def reservoir_tokens_number(corpus_sentences, number_of_tokens):
2     reservoir = []
3     len_sampled = []
4     considered_tokens = 0
5     sentence_number = -1
6
7     for sentence_num, sentence in enumerate(corpus_sentences):
8         considered_tokens += len(sentence)
9         if considered_tokens < size*1.2:
10             reservoir.append(sentence_number)
11             len_sampled.append(len(sentence))

```

| <b>catena</b>                  | <b>frequency</b> | <b>mi</b> |
|--------------------------------|------------------|-----------|
| <b>largest MI</b>              |                  |           |
| @nsubj @root                   | 294.59K          | 633.93K   |
| @nsubj _VERB                   | 269.81K          | 621.08K   |
| _DET _NOUN                     | 189.97K          | 552.32K   |
| @det _NOUN                     | 185.64K          | 550.92K   |
| _VERB @obj                     | 190.72K          | 520.82K   |
| _PRON _VERB                    | 271.44K          | 503.17K   |
| _PRON @root                    | 290.78K          | 487.42K   |
| @nsubj _AUX @root              | 129.60K          | 478.86K   |
| @nsubj _VERB @obj              | 111.34K          | 466.75K   |
| _VERB _ADP @obl                | 68.30K           | 429.38K   |
| <b>MI near zero</b>            |                  |           |
| _NOUN @root @xcomp _NOUN       | 320              | 0.04      |
| @cc _PRON @root you            | 169              | 0.03      |
| @nsubj _ADV @det _NOUN _VERB   | 113              | -0.01     |
| _PRON want _ADJ                | 100              | 0.03      |
| _ADV _AUX _VERB @advmod _NOUN  | 90               | -0.05     |
| _NOUN _NOUN @root _ADJ @obj    | 79               | -0.01     |
| _PRON _VERB @nsubj @aux _ADJ   | 78               | 0.03      |
| _VERB _VERB _VERB _VERB @xcomp | 77               | 0         |
| @obl:tmod @aux _VERB           | 63               | -0.03     |
| @nsubj _PART _VERB _PART @root | 53               | -0.01     |
| <b>smallest MI</b>             |                  |           |
| _PRON _PRON                    | 12.74K           | -37.53K   |
| _PRON @nsubj                   | 17.50K           | -35.54K   |
| @root @nsubj                   | 27.61K           | -34.89K   |
| @nsubj _PRON                   | 11.63K           | -30.47K   |
| _PRON _AUX                     | 19.00K           | -27.03K   |
| _VERB @nsubj                   | 12.79K           | -26.82K   |
| _AUX _PRON                     | 15.75K           | -26.67K   |
| _VERB @root                    | 8.40K            | -25.63K   |
| _NOUN _PRON                    | 8.01K            | -24.28K   |
| @root _AUX                     | 21.86K           | -24.27K   |

Table 4: Catenae extracted from CHILDES with their frequency and mutual information.

| <b>catena</b>                 | <b>frequency</b> | <b>mi</b> |
|-------------------------------|------------------|-----------|
| <b>largest MI</b>             |                  |           |
| @nsubj _AUX @root             | 115.74K          | 466.29K   |
| @nsubj _VERB                  | 192.29K          | 454.95K   |
| @nsubj @root                  | 202.63K          | 425.80K   |
| _VERB @obj                    | 143.34K          | 405.82K   |
| _DET _NOUN                    | 146.24K          | 382.79K   |
| @det _NOUN                    | 142.79K          | 378.51K   |
| _PRON _AUX @root              | 107.77K          | 367.34K   |
| @nsubj @aux _VERB             | 77.18K           | 361.89K   |
| _VERB _ADP @obl               | 60.26K           | 357.30K   |
| _VERB @case @obl              | 58.17K           | 347.78K   |
| <b>MI around zero</b>         |                  |           |
| @root @obj _PRON @det _NOUN   | 200              | 0.05      |
| i @root _ADP _ADV             | 156              | 0         |
| _DET @nsubj _VERB _PRON _ADV  | 141              | 0.02      |
| we here                       | 96               | 0.05      |
| _VERB @amod _NOUN _NOUN _ADV  | 77               | 0         |
| @nsubj @root _PRON _PART _ADJ | 75               | 0.04      |
| @advcl @aux @nsubj @root      | 68               | -0.03     |
| _DET @obl you _VERB           | 62               | -0.01     |
| gets _NOUN                    | 61               | 0         |
| away @obl                     | 59               | 0.01      |
| <b>smallest MI</b>            |                  |           |
| _PRON @nsubj                  | 10.05K           | -22.43K   |
| @root @nsubj                  | 9.93K            | -22.34K   |
| _PRON _PRON                   | 6.01K            | -20.97K   |
| _NOUN _PRON                   | 5.69K            | -19.56K   |
| _VERB @root                   | 6.09K            | -19.07K   |
| @nsubj _PRON                  | 5.71K            | -17.39K   |
| _NOUN @root                   | 48.34K           | -16.99K   |
| _PRON _AUX                    | 6.90K            | -16.22K   |
| _VERB @nsubj                  | 6.13K            | -15.97K   |
| @root _AUX                    | 6.44K            | -15.79K   |

Table 5: Catenae extracted from opensubtitles with their frequency and mutual information.

| catena                                 | frequency | mi                       |
|----------------------------------------|-----------|--------------------------|
| <b>largest MI</b>                      |           |                          |
| _VERB _ADP @obl                        | 76.03K    | 386.69K                  |
| _VERB @case @obl                       | 75.77K    | 381.07K                  |
| @nsubj:pass @aux:pass _VERB _ADP @obl  | 24.27K    | 314.61K                  |
| @nsubj:pass @aux:pass _VERB @case @obl | 24.20K    | 312.29K                  |
| _DET _NOUN                             | 150.28K   | 311.67K                  |
| @det _NOUN                             | 149.04K   | 309.86K                  |
| @nsubj:pass _AUX _VERB _ADP @obl       | 26.43K    | 302.78K                  |
| @nsubj:pass _AUX _VERB @case @obl      | 26.35K    | 300.35K                  |
| @nsubj @root                           | 96.50K    | 299.59K                  |
| _DET _NOUN @case @nmod                 | 51.00K    | 295.75K                  |
| <b>MI around zero</b>                  |           |                          |
| @det _PROPN _ADP _PROPN _NOUN          | 545       | -0.04                    |
| _PROPN _PROPN @nsubj _NOUN _VERB       | 293       | 0.02                     |
| @det _NOUN _PROPN _AUX _PROPN          | 270       | 0.02                     |
| @det @obl @root @nmod                  | 195       | -0.03                    |
| _ADP _NUM _NOUN _ADP _PROPN            | 194       | 0.03                     |
| _PROPN is @compound _PROPN             | 178       | 0.02                     |
| @nsubj @det _NOUN @case @obl           | 145       | 0.03                     |
| @root _DET _NOUN @case _PRON           | 142       | 0.04                     |
| _AUX @root _ADP _ADP _PROPN            | 130       | -0.04                    |
| _DET _PROPN @compound @nmod _NOUN      | 127       | -0.01 <b>smallest MI</b> |
|                                        |           |                          |
| _PROPN _NOUN                           | 34.51K    | -13.55K                  |
| _PROPN @case                           | 4.77K     | -12.51K                  |
| _NOUN @nsubj                           | 6.02K     | -12.44K                  |
| _NOUN _ADJ                             | 8.04K     | -12.13K                  |
| _NOUN @obl                             | 8.49K     | -11.03K                  |
| _NOUN @case                            | 2.32K     | -9.78K                   |
| @nmod _NOUN                            | 8.38K     | -9.70K                   |
| @case @root                            | 4.27K     | -9.25K                   |
| _ADP @root                             | 4.26K     | -9.02K                   |
| _NOUN @compound                        | 3.02K     | -8.89K                   |

Table 6: Catenae extracted from simplewikipedia with their frequency and mutual information.

|          | negative | none     | positive |
|----------|----------|----------|----------|
| negative | -        | 7.32e-01 | 1.33e-03 |
| none     | 0.732    | -        | 5.71e-29 |
| positive | 0.001    | 5.71e-29 | -        |

Table 7: CAT1 posthoc diffs

|          | negative | none     | positive |
|----------|----------|----------|----------|
| negative | -        | 6.83e-06 | 4.57e-05 |
| none     | 0.000    | -        | 4.15e-29 |
| positive | 0.000    | 4.15e-29 | -        |

Table 8: CAT1 posthoc diffs

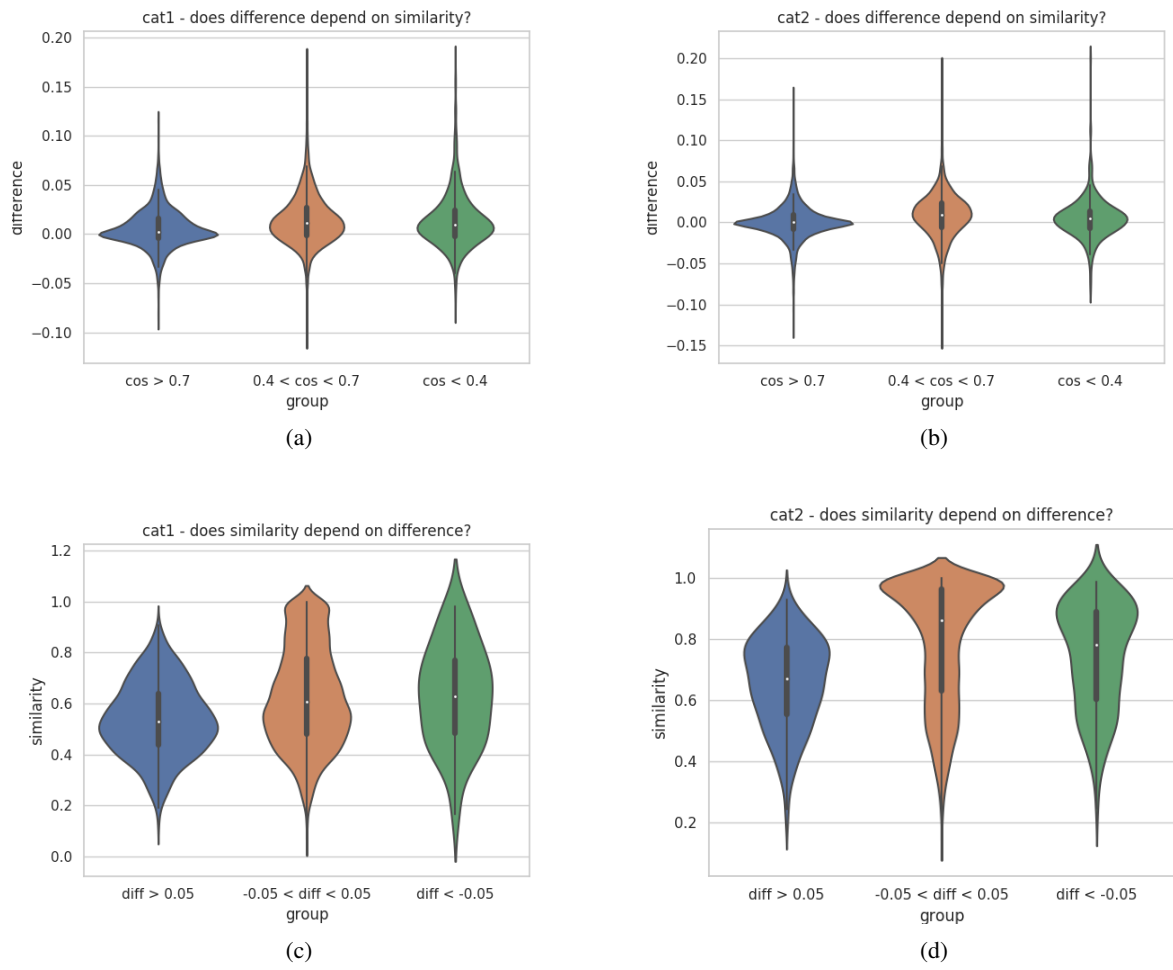

Figure 1

|                    | $\cos < 0.4$ | $0.4 < \cos < 0.7$ | $\cos > 0.7$ |
|--------------------|--------------|--------------------|--------------|
| $\cos < 0.4$       | -            | 1.297866e-02       | 1.531517e-19 |
| $0.4 < \cos < 0.7$ | 1.297866e-02 | -                  | 5.071673e-67 |
| $\cos > 0.7$       | 1.531517e-19 | 5.071673e-67       | -            |

Table 9: CAT1 cos

|                    | $\cos < 0.4$ | $0.4 < \cos < 0.7$ | $\cos > 0.7$ |
|--------------------|--------------|--------------------|--------------|
| $\cos < 0.4$       | -            | 2.296763e-04       | 1.829284e-05 |
| $0.4 < \cos < 0.7$ | 0.000230     | -                  | 4.158696e-73 |
| $\cos > 0.7$       | 0.000018     | 4.158696e-73       | -            |

Table 10: CAT2 cos

```

12  else :
13      j = random.randrange(sentence_num)
14      if j < len(reservoir):
15          reservoir[j] = sentence_num
16          len_sampled[j] = len(sentence)
17
18  x = 0
19  i = 0
20  while x < size and i < len(reservoir):
21      x += len_sampled[i]
22      i = i+1
23  return list(sorted(reservoir[:i]))

```

Listing 2: Recursive algorithm for the extraction of catenae

```

1  def recursive_C(A, tree_children , th=5):
2      # if A is a leaf
3      if A not in tree_children:
4          return [[A]], [[A]]
5      else :
6          found_catenae = []
7          list_of_indep_catenae = [[[A]]]
8          for a_child in tree_children[A]:
9              c, all_c = recursive_C(a_child , tree_children)
10             found_catenae += all_c
11             list_of_indep_catenae.append([[None]] + c)
12
13         X = []
14         for tup in itertools.product(*list_of_indep_catenae):
15             new_catena = list(sorted(filter(
16                 lambda x: x is not None, sum(tup , []))))
17             if len(new_catena) <= th:
18                 X.append(new_catena)
19
20         return X, X+found_catenae
21
22  def extract(sentence):
23      children = {}
24      tokens = {}
25      postags = {}
26      rels = {}
27      excluded_relations = ["discourse", "fixed", "flat", "comound",
28                           "list", "parataxis", "orphan", "goeswith",
29                           "reparandum", "punct", "dep"]
30      for token in sentence:
31          position, word, lemma, pos, _, morph, head, rel, _, _ = token
32          if not pos == "PUNCT" and not rel in excluded_relations:
33              if head not in children:
34                  children[head] = []
35                  children[head].append(position)
36                  tokens[position] = word
37                  postags[position] = "_" + pos

```



```

38     rels[position] = "@"+rel
39
40     if 0 in children:
41         root = children[0][0]
42         _, catenae = recursive_C(root, children)
43
44     for catena in catenae:
45
46         tokensandpostags = [[tokens[x] for x in catena],
47                             [postags[x] for x in catena],
48                             [rels[x] for x in catena]]
49
50         temp = [(0, 1, 2)] * len(catena)
51         X = list(itertools.product(*temp))
52
53         for c in X:
54             cat = []
55             for i, el in enumerate(c):
56                 cat.append(tokensandpostags[el][i])
57             cat = tuple(cat)
58             if len(cat) > 1:
59                 yield cat

```

|       | CHILDES |       |       |       |       |       |       |       |       |
|-------|---------|-------|-------|-------|-------|-------|-------|-------|-------|
|       | EPO5    | EPO10 | EPO15 | EPO20 | EPO25 | EPO30 | EPO35 | BM    | input |
| EPO5  | 1       | 0,922 | 0,925 | 0,892 | 0,894 | 0,882 | 0,924 | 0,914 | 0,897 |
| EPO10 | 0,919   | 1     | 0,93  | 0,935 | 0,924 | 0,917 | 0,946 | 0,951 | 0,924 |
| EPO15 | 0,912   | 0,923 | 1     | 0,925 | 0,929 | 0,92  | 0,955 | 0,949 | 0,934 |
| EPO20 | 0,887   | 0,929 | 0,916 | 1     | 0,894 | 0,885 | 0,94  | 0,942 | 0,921 |
| EPO25 | 0,877   | 0,912 | 0,919 | 0,902 | 1     | 0,941 | 0,947 | 0,945 | 0,923 |
| EPO30 | 0,87    | 0,912 | 0,92  | 0,899 | 0,938 | 1     | 0,94  | 0,946 | 0,936 |
| EPO35 | 0,921   | 0,944 | 0,952 | 0,945 | 0,95  | 0,942 | 1     | 0,983 | 0,961 |
| BM    | 0,906   | 0,945 | 0,945 | 0,946 | 0,949 | 0,946 | 0,983 | 1     | 0,96  |
| input | 0,89    | 0,908 | 0,931 | 0,911 | 0,913 | 0,936 | 0,954 | 0,953 | 1     |

Table 11

|       | OPENSUBTITLES |       |       |       |       |       |       |       |       |       |       |
|-------|---------------|-------|-------|-------|-------|-------|-------|-------|-------|-------|-------|
|       | EPO5          | EPO10 | EPO15 | EPO20 | EPO25 | EPO30 | EPO35 | EPO40 | EPO45 | BM    | input |
| EPO5  | 1             | 0,851 | 0,883 | 0,907 | 0,879 | 0,892 | 0,911 | 0,913 | 0,907 | 0,915 | 0,87  |
| EPO10 | 0,875         | 1     | 0,91  | 0,897 | 0,912 | 0,908 | 0,921 | 0,928 | 0,927 | 0,932 | 0,896 |
| EPO15 | 0,871         | 0,894 | 1     | 0,904 | 0,918 | 0,929 | 0,933 | 0,938 | 0,911 | 0,94  | 0,894 |
| EPO20 | 0,916         | 0,882 | 0,918 | 1     | 0,942 | 0,924 | 0,944 | 0,958 | 0,94  | 0,954 | 0,931 |
| EPO25 | 0,903         | 0,906 | 0,934 | 0,951 | 1     | 0,938 | 0,951 | 0,966 | 0,954 | 0,961 | 0,942 |
| EPO30 | 0,888         | 0,905 | 0,942 | 0,914 | 0,929 | 1     | 0,941 | 0,953 | 0,916 | 0,946 | 0,918 |
| EPO35 | 0,881         | 0,832 | 0,906 | 0,896 | 0,873 | 0,906 | 1     | 0,935 | 0,946 | 0,948 | 0,884 |
| EPO40 | 0,914         | 0,905 | 0,943 | 0,957 | 0,952 | 0,958 | 0,973 | 1     | 0,966 | 0,99  | 0,952 |
| EPO45 | 0,905         | 0,829 | 0,911 | 0,906 | 0,874 | 0,908 | 0,978 | 0,953 | 1     | 0,978 | 0,891 |
| BM    | 0,915         | 0,89  | 0,944 | 0,944 | 0,931 | 0,948 | 0,983 | 0,988 | 0,98  | 1     | 0,937 |
| input | 0,877         | 0,892 | 0,895 | 0,936 | 0,94  | 0,924 | 0,927 | 0,956 | 0,928 | 0,949 | 1     |

Table 12

| SIMPLEWIKIPEDIA |       |       |       |       |       |       |       |       |       |
|-----------------|-------|-------|-------|-------|-------|-------|-------|-------|-------|
|                 | EPO5  | EPO10 | EPO15 | EPO20 | EPO25 | EPO30 | EPO35 | BM    | input |
| EPO5            | 1     | 0,882 | 0,897 | 0,893 | 0,875 | 0,879 | 0,894 | 0,887 | 0,843 |
| EPO10           | 0,878 | 1     | 0,919 | 0,909 | 0,909 | 0,909 | 0,952 | 0,908 | 0,884 |
| EPO15           | 0,899 | 0,918 | 1     | 0,908 | 0,916 | 0,927 | 0,954 | 0,956 | 0,912 |
| EPO20           | 0,856 | 0,914 | 0,91  | 1     | 0,928 | 0,93  | 0,937 | 0,913 | 0,875 |
| EPO25           | 0,822 | 0,905 | 0,908 | 0,927 | 1     | 0,967 | 0,925 | 0,928 | 0,871 |
| EPO30           | 0,815 | 0,897 | 0,907 | 0,91  | 0,961 | 1     | 0,919 | 0,921 | 0,873 |
| EPO35           | 0,896 | 0,948 | 0,955 | 0,934 | 0,929 | 0,937 | 1     | 0,946 | 0,923 |
| BM              | 0,878 | 0,9   | 0,957 | 0,91  | 0,926 | 0,917 | 0,942 | 1     | 0,911 |
| input           | 0,856 | 0,872 | 0,901 | 0,868 | 0,87  | 0,874 | 0,914 | 0,900 | 1     |

Table 13

|                 |       | CHILDES |       | OPENSUBTITLES |       | SIMPLEWIKIPEDIA |       |
|-----------------|-------|---------|-------|---------------|-------|-----------------|-------|
|                 |       | BM      | input | BM            | input | BM              | input |
| CHILDES         | BM    | 1       | 0,96  | 0,632         | 0,62  | 0,283           | 0,276 |
|                 | input | 0,953   | 1     | 0,646         | 0,636 | 0,285           | 0,275 |
| OPENSUBTITLES   | BM    | 0,712   | 0,708 | 1             | 0,937 | 0,315           | 0,311 |
|                 | input | 0,729   | 0,739 | 0,949         | 1     | 0,347           | 0,344 |
| SIMPLEWIKIPEDIA | BM    | 0,317   | 0,307 | 0,346         | 0,342 | 1               | 0,911 |
|                 | input | 0,319   | 0,304 | 0,343         | 0,342 | 0,900           | 1     |

Table 14

## References

Milan Straka and Jana Straková. 2018. [Universal dependencies 2.3 models for UDPipe \(2018-11-15\)](#). LINDAT/CLARIAH-CZ digital library at the Institute of Formal and Applied Linguistics (ÚFAL), Faculty of Mathematics and Physics, Charles University.
